# Supplementary material for: Factors Associated With Initial Prasugrel Versus Clopidogrel Selection for Patients With Acute Myocardial Infarction Undergoing Percutaneous Coronary Intervention: Insights From the Treatment With ADP Receptor Inhibitors: Longitudinal Assessment of Treatment Patterns and Events After Acute Coronary Syndrome (TRANSLATE‐ACS) Study
Source: PubMed Central journal article supplement — J Am Heart Assoc. 2016 Sep 23;5(9):e003946. doi: 10.1161/JAHA.116.003946 (PMC5079042; doi:10.1161/jaha.116.003946), 2016-09-23
Supplement: JAH3-5-e003946-s001.pdf [file JAH3-5-e003946-s001.pdf]

# SUPPLEMENTAL MATERIAL

**Table S1. TRANSLATE-ACS model covariate list:**

| <b>Variable</b>                                             | <b>Variable type</b>     |
|-------------------------------------------------------------|--------------------------|
| Age                                                         | Continuous               |
| Age                                                         | $\geq 75 / < 75$ years   |
| Male gender                                                 | Yes/no                   |
| Race                                                        | White/Black/Other        |
| Hispanic                                                    | Yes/no                   |
| Private insurance                                           | Yes/no                   |
| Federal/State insurance                                     | Yes/no                   |
| None/Non-US insurance                                       | Yes/no                   |
| Income (based on zip code data and income per neighborhood) | Continuous               |
| Prior MI                                                    | Yes/no                   |
| Prior PCI                                                   | Yes/no                   |
| Prior CABG                                                  | Yes/no                   |
| History of Cerebrovascular disease                          | Yes/no                   |
| Prior Stroke or TIA                                         | Yes/no                   |
| History of Peripheral Artery Disease                        | Yes/no                   |
| Prior HF                                                    | Yes/no                   |
| History of Atrial Fibrillation/Flutter                      | Yes/no                   |
| Diabetes                                                    | Yes/no                   |
| Hypertension                                                | Yes/no                   |
| Dyslipidemia                                                | Yes/no                   |
| Dialysis                                                    | Yes/no                   |
| Current/Recent Smoker                                       | Yes/no                   |
| Chronic Lung Disease                                        | Yes/no                   |
| GI/GU bleeding within last 6 months                         | Yes/no                   |
| Home aspirin use (prior to admission)                       | Yes/no                   |
| Home any ADPri use                                          | Yes/no                   |
| Home oral anticoagulant use                                 | Yes/no                   |
| STEMI (vs Non-STEMI)                                        | Yes/no                   |
| Cardiac Arrest w/in 24 hours                                | Yes/no                   |
| Cardiogenic shock w/in 24 hours                             | Yes/no                   |
| HF w/in 2 weeks                                             | Yes/no                   |
| BMI                                                         | Continuous               |
| Body weight                                                 | $\geq 60$ kg / $< 60$ kg |

|                                                                                                                         |                         |
|-------------------------------------------------------------------------------------------------------------------------|-------------------------|
| Admission heart rate                                                                                                    | Continuous              |
| Admission systolic BP                                                                                                   | Continuous              |
| Arterial access site                                                                                                    | Femoral vs. non-femoral |
| Duke CAD index                                                                                                          | Continuous              |
| Left main disease*                                                                                                      | Yes/no                  |
| Number of diseased vessels*                                                                                             | 1,2,3                   |
| Lesion length (summed)                                                                                                  | Continuous              |
| Number of lesions treated                                                                                               | Continuous              |
| Bifurcation lesion                                                                                                      | Yes/no                  |
| Graft lesion                                                                                                            | Yes/no                  |
| Lesion success                                                                                                          | Yes/no                  |
| BMS                                                                                                                     | Yes/no                  |
| DES                                                                                                                     | Yes/no                  |
| Other PCI device (no stent)                                                                                             | Yes/no                  |
| Ejection Fraction                                                                                                       | Continuous              |
| Pre-procedure Troponin                                                                                                  | Continuous              |
| Pre-procedure Hemoglobin                                                                                                | Continuous              |
| Creatinine clearance (only calculated for patients not on dialysis; set to a pre-specified value for those on dialysis) | Continuous              |
| Married                                                                                                                 | Yes/no                  |
| High School graduate                                                                                                    | Yes/no                  |
| Employed                                                                                                                | Yes/no                  |
| Transfer-in status                                                                                                      | Yes/no                  |
| EQ5D index                                                                                                              | Continuous              |
| EQ5D VAS score                                                                                                          | Continuous              |
